# Supplementary material
Source: PubMed Central journal article supplement (PMC3257905)
Supplement: supp_79.11.4361_IAI5332-11_ST1.pdf [file supp_79.11.4361_IAI5332-11_ST1.pdf]

**Supplemental Table 1: NTHI 86-028NP OMV proteins identified by LC-MS/MS.**

| <b>Identified Proteins</b>                                                 | <b>Gene Number</b> | <b>Accession Number</b> | <b>Molecular Weight</b> | <b>Protein Hits <sup>1</sup></b> |
|----------------------------------------------------------------------------|--------------------|-------------------------|-------------------------|----------------------------------|
| Outer membrane protein P2 precursor                                        | NTHI0225           | 68056946                | 40 kDa                  | 135                              |
| Outer membrane protein P5                                                  | NTHI1332           | 68057911                | 38 kDa                  | 46                               |
| Probable amino-acid ABC transporter binding protein                        | NTHI1243           | 68057836                | 28 kDa                  | 34                               |
| HMW1B, OMP-85-like protein required for secretion of HMW1A and HMW2A       | NTHI1984           | 68058015                | 61 kDa                  | 34                               |
| IgA-specific serine endopeptidase                                          | NTHI1164           | 68057774                | 197 kDa                 | 32                               |
| L-lactate dehydrogenase                                                    | NTHI2049           | 68058536                | 42 kDa                  | 30                               |
| HMW2B, OMP-85-like protein required for HMW1A and HMW2A secretion          | NTHI1449           | 68058015                | 61 kDa                  | 27                               |
| NAD nucleotidase                                                           | NTHI0303           | 68057010                | 66 kDa                  | 26                               |
| Phosphate-binding periplasmic protein precursor PstS                       | NTHI1774           | 68058299                | 37 kDa                  | 26                               |
| Conserved protein                                                          | NTHI1208           | 68057809                | 41 kDa                  | 26                               |
| Probable periplasmic serine protease do/HhoA-like precursor                | NTHI1905           | 68058410                | 49 kDa                  | 25                               |
| TRAP-type C4-dicarboxylate transport system, periplasmic component         | NTHI0232           | 68056953                | 36 kDa                  | 25                               |
| Hemoglobin-haptoglobin binding protein B                                   | NTHI0782           | 68057439                | 114 kDa                 | 25                               |
| Heme utilization protein                                                   | NTHI1390           | 68057962                | 103 kDa                 | 24                               |
| Putative periplasmic chelated iron binding protein                         | NTHI0481           | 68057164                | 32 kDa                  | 23                               |
| 2',3'-cyclic-nucleotide 2'-phosphodiesterase                               | NTHI0741           | 68057402                | 73 kDa                  | 22                               |
| Periplasmic oligopeptide-binding protein                                   | NTHI1292           | 68057874                | 61 kDa                  | 22                               |
| Probable D-methionine-binding lipoprotein MetQ                             | NTHI0877           | 68057518                | 30 kDa                  | 18                               |
| Thiamine-binding periplasmic protein                                       | NTHI1185           | 68057791                | 37 kDa                  | 17                               |
| High-affinity zinc uptake system protein ZnuA                              | NTHI0208           | 68056931                | 37 kDa                  | 16                               |
| HMW1A, high molecular weight adhesin 1                                     | NTHI1983           | 68058480                | 154 kDa                 | 16                               |
| Heme-binding protein A                                                     | NTHI1021           | 68057646                | 61 kDa                  | 15                               |
| Ribose-binding periplasmic protein                                         | NTHI0632           | 68057302                | 30 kDa                  | 15                               |
| Spermidine/putrescine-binding periplasmic protein 1 precursor              | NTHI1823           | 68058340                | 43 kDa                  | 14                               |
| Spermidine/putrescine-binding periplasmic protein 2 precursor              | NTHI0626           | 68057296                | 40 kDa                  | 14                               |
| D-galactose-binding periplasmic protein precursor                          | NTHI0987           | 68057616                | 38 kDa                  | 10                               |
| Iron-utilization periplasmic protein hFbpA                                 | NTHI0177           | 68056907                | 36 kDa                  | 10                               |
| Predicted ABC-type transport system protein, periplasmic component         | NTHI1707           | 68058243                | 31 kDa                  | 10                               |
| Conserved protein                                                          | NTHI0576           | 68057248                | 20 kDa                  | 10                               |
| Outer membrane protein P4, NADP phosphatase                                | NTHI0816           | 209447614               | 29 kDa                  | 10                               |
| Outer membrane protein P1 precursor                                        | NTHI0522           | 68057203                | 50 kDa                  | 9                                |
| Putative ABC-type Co <sup>2+</sup> transport system, periplasmic component | NTHI1418           | 68057985                | 26 kDa                  | 8                                |
| Probable FKBP-type peptidyl-prolyl cis-trans isomerase                     | NTHI0707           | 68057373                | 26 kDa                  | 8                                |
| Elongation factor Ts                                                       | NTHI1081           | 68057699                | 30 kDa                  | 8                                |
| Putative lipoprotein                                                       | NTHI1957           | 68058456                | 63 kDa                  | 7                                |
| Glycerophosphoryl diester phosphodiesterase precursor                      | NTHI0811           | 68057465                | 42 kDa                  | 7                                |
| Outer membrane protein 26                                                  | NTHI1083           | 68057701                | 22 kDa                  | 6                                |
| Thiol:disulfide interchange protein DsbA                                   | NTHI1012           | 68057639                | 23 kDa                  | 6                                |

|                                                          |          |           |         |   |
|----------------------------------------------------------|----------|-----------|---------|---|
| Protective surface antigen D15                           | NTHI1084 | 68057702  | 88 kDa  | 6 |
| Predicted periplasmic or secreted lipoprotein            | NTHI1960 | 68058459  | 20 kDa  | 6 |
| Conserved lipoprotein                                    | NTHI0363 | 68057062  | 23 kDa  | 6 |
| ATP synthase beta chain                                  | NTHI0609 | 68057280  | 50 kDa  | 6 |
| Conserved protein                                        | NTHI0353 | 68057053  | 16 kDa  | 6 |
| 30S ribosomal protein S2                                 | NTHI1080 | 161761272 | 26 kDa  | 6 |
| VacJ lipoprotein                                         | NTHI0849 | 68057493  | 28 kDa  | 6 |
| Na(+)-translocating NADH-quinone reductase subunit A     | NTHI0254 | 68056970  | 49 kDa  | 6 |
| Elongation factor G                                      | NTHI0747 | 68057408  | 77 kDa  | 6 |
| Enolase                                                  | NTHI1103 | 68057718  | 46 kDa  | 6 |
| Preprotein translocase subunit YidC                      | NTHI1175 | 68057784  | 61 kDa  | 6 |
| Peptidyl-prolyl cis-trans isomerase D                    | NTHI1179 | 68057786  | 70 kDa  | 6 |
| Arginine-binding periplasmic protein                     | NTHI1347 | 68057925  | 26 kDa  | 6 |
| NAD(P) transhydrogenase subunit alpha                    | NTHI1802 | 68058322  | 55 kDa  | 6 |
| Pyruvate dehydrogenase E1 component                      | NTHI1933 | 68058433  | 99 kDa  | 6 |
| Probable D-methionine transport ATP-binding protein      | NTHI0879 | 68057520  | 38 kDa  | 6 |
| Conserved lipoprotein                                    | NTHI0266 | 68056981  | 29 kDa  | 5 |
| Conserved protein                                        | NTHI1987 | 68058484  | 23 kDa  | 5 |
| Elongation factor Tu                                     | NTHI0712 | 68057378  | 43 kDa  | 4 |
| Beta-lactamase TEM precursor                             | NTHI2055 | 156617159 | 32 kDa  | 4 |
| TolB                                                     | NTHI0502 | 68057184  | 45 kDa  | 4 |
| Survival protein SurA homolog                            | NTHI0588 | 68057259  | 35 kDa  | 4 |
| Conserved protein                                        | NTHI1140 | 68057753  | 21 kDa  | 4 |
| Conserved protein                                        | NTHI0267 | 68056982  | 18 kDa  | 4 |
| Peroxisredoxin/glutaredoxin                              | NTHI0705 | 68057371  | 27 kDa  | 4 |
| Anaerobic C4-dicarboxylate transporter DcuB              | NTHI0902 | 68057542  | 47 kDa  | 4 |
| Conserved ABC-type transport system protein              | NTHI1247 | 68057840  | 24 kDa  | 4 |
| Thioredoxin                                              | NTHI0098 | 68056833  | 12 kDa  | 4 |
| Na(+)-translocating NADH-quinone reductase subunit F     | NTHI0259 | 68056975  | 46 kDa  | 4 |
| Conserved preprotein translocase subunit YajC            | NTHI0347 | 68057048  | 11 kDa  | 4 |
| Heme/hemopexin-binding protein C                         | NTHI0369 | 68057068  | 79 kDa  | 4 |
| Conserved protein                                        | NTHI0490 | 68057172  | 23 kDa  | 4 |
| Possible starvation-inducible outer membrane lipoprotein | NTHI0509 | 68057191  | 21 kDa  | 4 |
| PTS system, fructose-specific IIA/FPPr component         | NTHI0575 | 68057247  | 53 kDa  | 4 |
| 50S ribosomal protein L7/L12                             | NTHI0761 | 68057418  | 12 kDa  | 4 |
| 30S ribosomal protein S3                                 | NTHI0945 | 68057578  | 26 kDa  | 4 |
| 50S ribosomal protein L17                                | NTHI0966 | 68057598  | 14 kDa  | 4 |
| Cysteine synthase                                        | NTHI1269 | 68057857  | 33 kDa  | 4 |
| aAcetate kinase                                          | NTHI1375 | 68057949  | 44 kDa  | 4 |
| NAD(P) transhydrogenase subunit beta                     | NTHI1801 | 68058321  | 50 kDa  | 4 |
| Molybdate-binding periplasmic protein                    | NTHI2000 | 68058496  | 27 kDa  | 4 |
| Adhesion and penetration protein Hap                     | NTHI0354 | 68057054  | 155 kDa | 4 |

|                                                                     |          |           |         |   |
|---------------------------------------------------------------------|----------|-----------|---------|---|
| 50S ribosomal protein L5                                            | NTHI0953 | 68057585  | 20 kDa  | 4 |
| Lipoprotein Nlpl                                                    | NTHI0335 | 68057038  | 36 kDa  | 4 |
| Outer membrane antigenic lipoprotein B                              | NTHI0830 | 68057479  | 42 kDa  | 4 |
| Thiamine biosynthesis lipoprotein ApbE                              | NTHI0260 | 68056976  | 38 kDa  | 3 |
| 30S ribosomal protein S7                                            | NTHI0746 | 68057407  | 18 kDa  | 3 |
| Glycerol-3-phosphate transporter                                    | NTHI0809 | 68057464  | 53 kDa  | 2 |
| Autotransported protein Lav                                         | NTHI0585 | 68057256  | 80 kDa  | 2 |
| Outer membrane protein P6 precursor                                 | NTHI0501 | 68057183  | 16 kDa  | 2 |
| Chaperone protein DnaK                                              | NTHI1929 | 68058430  | 68 kDa  | 2 |
| Conserved protein                                                   | NTHI2017 | 68058511  | 13 kDa  | 2 |
| Heme/hemopexin-binding protein B                                    | NTHI0370 | 68057069  | 63 kDa  | 2 |
| TolQ                                                                | NTHI0505 | 68057187  | 25 kDa  | 2 |
| 50S ribosomal protein L10                                           | NTHI0759 | 68057417  | 18 kDa  | 2 |
| Small protein A                                                     | NTHI1005 | 68057632  | 16 kDa  | 2 |
| Conserved putative gamma-carboxymuconolactone decarboxylase subunit | NTHI1214 | 68057814  | 12 kDa  | 2 |
| ATP synthase B chain                                                | NTHI0613 | 68057284  | 17 kDa  | 2 |
| Opacity protein                                                     | NTHI1342 | 68057921  | 18 kDa  | 2 |
| Uridine phosphorylase                                               | NTHI0389 | 161761279 | 27 kDa  | 2 |
| Sodium/proton antiporter nhaB                                       | NTHI0551 | 189029589 | 57 kDa  | 2 |
| Signal peptidase I                                                  | NTHI0020 | 68056765  | 40 kDa  | 2 |
| Conserved protein                                                   | NTHI0027 | 68056770  | 51 kDa  | 2 |
| Conserved lipoprotein                                               | NTHI0252 | 68056969  | 22 kDa  | 2 |
| Conserved protein                                                   | NTHI0319 | 68057025  | 23 kDa  | 2 |
| Polyribonucleotide nucleotidyltransferase                           | NTHI0334 | 68057037  | 77 kDa  | 2 |
| Heme/hemopexin-binding protein A                                    | NTHI0371 | 68057070  | 101 kDa | 2 |
| Serine transporter                                                  | NTHI0398 | 68057092  | 46 kDa  | 2 |
| Acetyl-coenzyme A carboxylase carboxyl transferase subunit alpha    | NTHI0528 | 68057207  | 35 kDa  | 2 |
| ATP synthase alpha chain                                            | NTHI0611 | 68057282  | 56 kDa  | 2 |
| DNA-directed RNA polymerase beta' chain                             | NTHI0640 | 68057310  | 157 kDa | 2 |
| Phosphoglycerate kinase                                             | NTHI0651 | 68057321  | 41 kDa  | 2 |
| Large-conductance mechanosensitive channel                          | NTHI0721 | 68057384  | 14 kDa  | 2 |
| Conserved protein                                                   | NTHI0821 | 68057472  | 66 kDa  | 2 |
| Protein NTHI0837                                                    | NTHI0837 | 68057485  | 33 kDa  | 2 |
| NADH dehydrogenase                                                  | NTHI0903 | 68057543  | 49 kDa  | 2 |
| Galactoside transport system permease protein MglC                  | NTHI0989 | 68057618  | 36 kDa  | 2 |
| Putative soluble lytic murein transglycosylase                      | NTHI0995 | 68057623  | 69 kDa  | 2 |
| CipB                                                                | NTHI1028 | 68057652  | 96 kDa  | 2 |
| 50S ribosomal protein L21                                           | NTHI1043 | 68057666  | 11 kDa  | 2 |
| Cell division protein ZipA                                          | NTHI1266 | 68057855  | 37 kDa  | 2 |
| Carbon starvation protein, predicted membrane protein               | NTHI1295 | 68057876  | 59 kDa  | 2 |
| Cell division protein FtsZ                                          | NTHI1311 | 68057891  | 45 kDa  | 2 |
| Predicted Na <sup>+</sup> /dicarboxylate symporter                  | NTHI1323 | 68057902  | 46 kDa  | 2 |

|                                                                                |          |           |        |   |
|--------------------------------------------------------------------------------|----------|-----------|--------|---|
| Putative L-lactate permease                                                    | NTHI1391 | 68057963  | 57 kDa | 2 |
| Pyruvate kinase                                                                | NTHI1479 | 68058040  | 51 kDa | 2 |
| 30S ribosomal protein S15                                                      | NTHI1652 | 68058196  | 10 kDa | 2 |
| Dihydrolipoamide acetyltransferase component of pyruvate dehydrogenase complex | NTHI1934 | 68058434  | 59 kDa | 2 |
| Tail-specific protease precursor                                               | NTHI1969 | 68058468  | 79 kDa | 2 |
| 50S ribosomal protein L1                                                       | NTHI0642 | 68057312  | 24 kDa | 2 |
| Protein-export membrane protein SecD                                           | NTHI0346 | 68057047  | 67 kDa | 1 |
| Probable cytochrome oxidase subunit I                                          | NTHI1236 | 68057831  | 58 kDa | 0 |
| Conserved protein                                                              | NTHI1667 | 68058207  | 20 kDa | 0 |
| Thiol:disulfide interchange protein DsbC                                       | NTHI1384 | 68057958  | 25 kDa | 0 |
| Predicted nucleoside permease                                                  | NTHI0645 | 68057315  | 43 kDa | 0 |
| Conserved protein                                                              | NTHI1930 | 68058431  | 53 kDa | 0 |
| N-acetylneuraminate epimerase                                                  | NTHI0235 | 189030826 | 40 kDa | 0 |
| 60 kDa chaperonin                                                              | NTHI0669 | 68057339  | 57 kDa | 0 |
| Membrane-bound lytic murein transglycosylase C precursor                       | NTHI0921 | 68057556  | 40 kDa | 0 |
| Conserved protein                                                              | NTHI1317 | 68057897  | 19 kDa | 0 |
| Conserved protein                                                              | NTHI1441 | 68058008  | 9 kDa  | 0 |
| Outer-membrane lipoproteins carrier protein precursor                          | NTHI1456 | 68058021  | 23 kDa | 0 |
| Outer membrane lipoprotein PCP precursor                                       | NTHI1473 | 68058035  | 15 kDa | 0 |
| 10 kDa chaperonin                                                              | NTHI0668 | 68057338  | 10 kDa | 0 |
| Predicted 5-formyltetrahydrofolate cyclo-ligase                                | NTHI1027 | 68057651  | 22 kDa | 0 |

<sup>1</sup>Purified OMVs isolated from 86-028NP were analyzed using LC-MS/MS and were matched with the NCBI *H. Influenzae* 86-028NP database. All proteins indentified are listed proteins and sorted by protein hits.
